# Supplementary material for: Drawing WS2 thermal sensors on paper substrates
Source: Royal Society of Chemistry journal article supplement (doi:10.1039/d0nr06036d), 2020-01-01
Supplement: d0nr06036d1.pdf [file d0nr06036d1.pdf]

## Supporting Information

### **Drawing WS<sub>2</sub> thermal sensors on paper substrates**

*Martin Lee,<sup>1</sup> Ali Mazaheri<sup>2,3</sup>, Herre S. J. van der Zant<sup>1</sup>, Riccardo Frisenda<sup>2</sup>, Andres Castellanos-Gomez<sup>2,\*</sup>*

<sup>1</sup>*Kavli Institute of Nanoscience, Delft University of Technology, Lorentzweg 1, 2628 CJ Delft, The Netherlands.*

<sup>2</sup>*Materials Science Factory. Instituto de Ciencia de Materiales de Madrid (ICMM-CSIC), Madrid, E-28049, Spain.*

<sup>3</sup>*Nanophysics research Lab., Department of Physics. University of Tehran, Tehran 14395, Iran.*

[andres.castellanos@csic.es](mailto:andres.castellanos@csic.es)

### **Comparison between the performance of WS<sub>2</sub> and graphite on-paper thermoresistive devices**

#### **Measurements on different WS<sub>2</sub> devices**

#### **Optical characterization of the WS<sub>2</sub> film on paper**

#### **Raman characterization of the graphite electrode drawn on top of the films**

#### **Characterization of the electrical properties of a WS<sub>2</sub> film on paper**

#### **Resistance vs. temperature of device shown in Figure 4 in log scale**

## Comparison between the performance of WS<sub>2</sub> and graphite on-paper thermoresistive devices

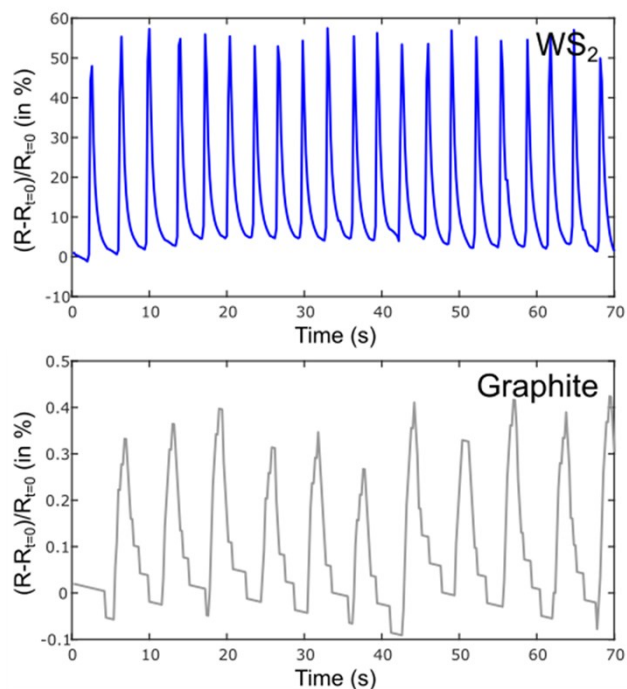

**Figure S1. Comparison between the response of WS<sub>2</sub> and graphite on-paper thermoresistive devices upon sudden temperature changes.**

The devices are warmed up at  $\sim 45$ - $55$  °C and a hand pump blows pulses of cool air onto the device that show up as increases in resistance. Note the big difference in the vertical axis for the different materials.

## Measurements on different WS<sub>2</sub> devices

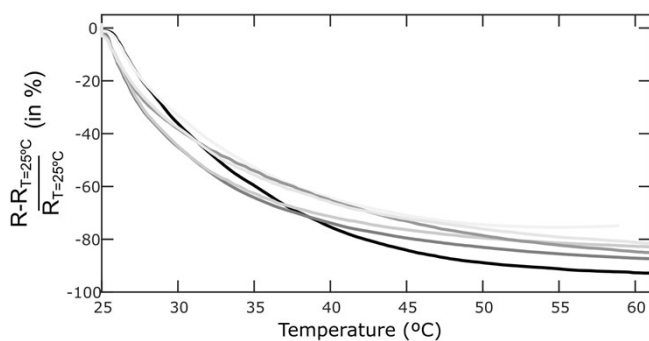

**Figure S2. Change in the resistance vs. temperature for 6 different WS<sub>2</sub> devices.**

Note that the devices were intended to span over a wide range of thicknesses. In fact, their room temperature resistance varies between  $0.7$  M $\Omega$  and  $20$  M $\Omega$ . Despite the difference in device resistance the resistance change is rather reproducible in all the devices.

## Optical characterization of the WS<sub>2</sub> film on paper

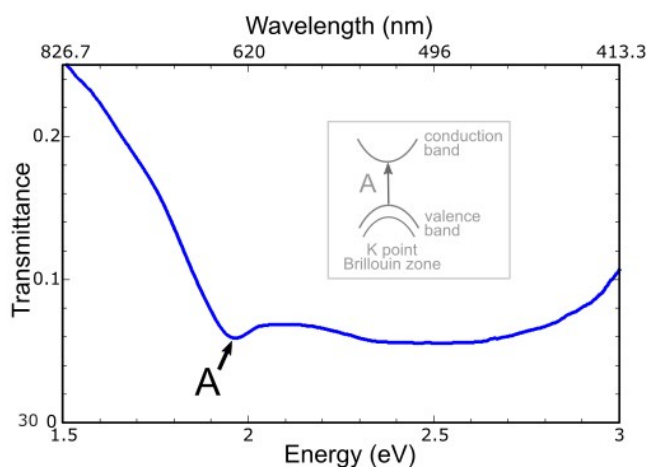

**Figure S3. Transmittance spectrum of a WS<sub>2</sub> film on paper.** The differential transmittance (normalized with respect to bare, uncovered paper) of the WS<sub>2</sub> film shows a prominent peak at  $\sim 1.95$  eV that agrees well with the one observed in multilayer WS<sub>2</sub> flakes. This peak is attributed to the resonant absorption for photons with the energy matching the direct band gap transition A at the K point of the Brillouin zone.

## Raman characterization of the graphite electrode drawn on top of the films

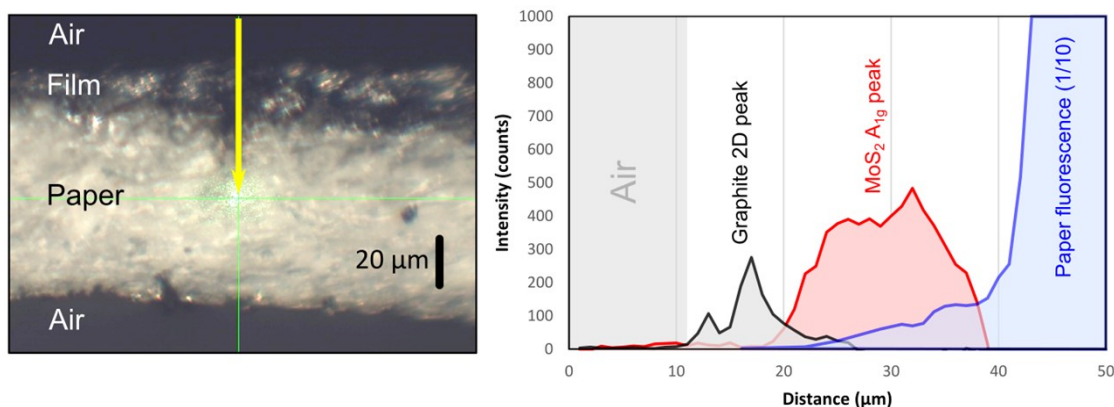

**Figure S4. Characterization of the interface of a graphite electrode drawn onto a MoS<sub>2</sub> film on paper.** (left) Optical microscopy image of the film/paper cross-section studied by Raman spectroscopy. The yellow arrow indicates the approximate line scan measured. (right) Intensity of the different Raman peaks as a function of the distance. The line scan starts outside the sample and at  $\sim 10$   $\mu\text{m}$  the signal from the graphite 2D peak starts to be measurable. The MoS<sub>2</sub> signal (A<sub>1g</sub> peak) starts to increase when the graphite signal drops. The paper fluorescence signal is also plotted showing how its intensity increases dramatically once the MoS<sub>2</sub> signal drops. The spot-size used in this measurement is  $\sim 5$   $\mu\text{m}$  in diameter which would explain the intermixed signal between the graphite and MoS<sub>2</sub>.

## Characterization of the electrical properties of a WS<sub>2</sub> film on paper

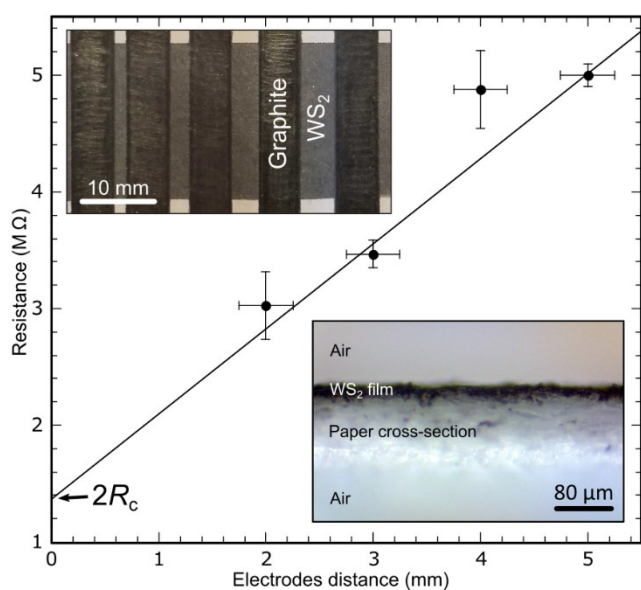

**Figure S5. Transfer length measurement to determine the contact resistance and conductivity of a WS<sub>2</sub> film on paper.** A long bar-shaped WS<sub>2</sub> film is drawn on paper (20 mm wide,  $20 \pm 5 \mu\text{m}$  thick) with graphite electrodes with different electrode spacing. The insets show a picture of the device and a cross-section optical microscopy image of a cross-section of the WS<sub>2</sub> film on paper to determine the thickness. The resistance between different pairs of electrodes are measured. The contact resistance ( $R_c = 0.7 \text{ M}\Omega$ ) is extracted from the crossing of the linear fit with the vertical axis. The conductivity of the film ( $G = 3.5 \pm 1.3 \text{ mS/m}$ ) is extracted from the slope of the resistance vs. electrodes distance linear trend and the device geometry.

## Resistance vs. temperature of device shown in Figure 4 in log scale

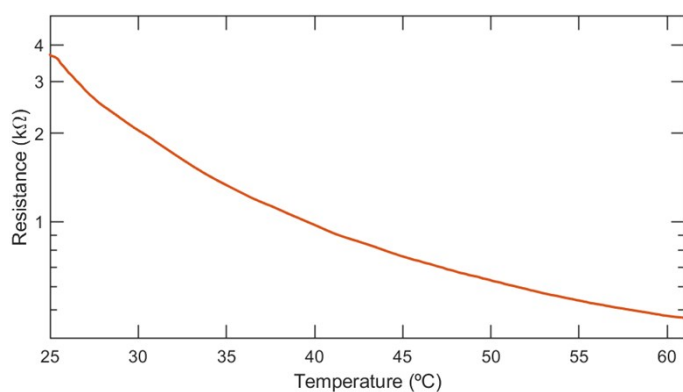

**Figure S6. Resistance vs. temperature characteristics of the thermoresistive device shown in Figure 4 of the main text but in log-scale to demonstrate that it cannot be fitted to a single exponential decay.**
